# Supplementary material
Source: Springer Nature journal article supplement (https://www.springermedizin.de/resource/supplementary/12889_2011_4202_MOESM1_ESM.pdf/9491286)

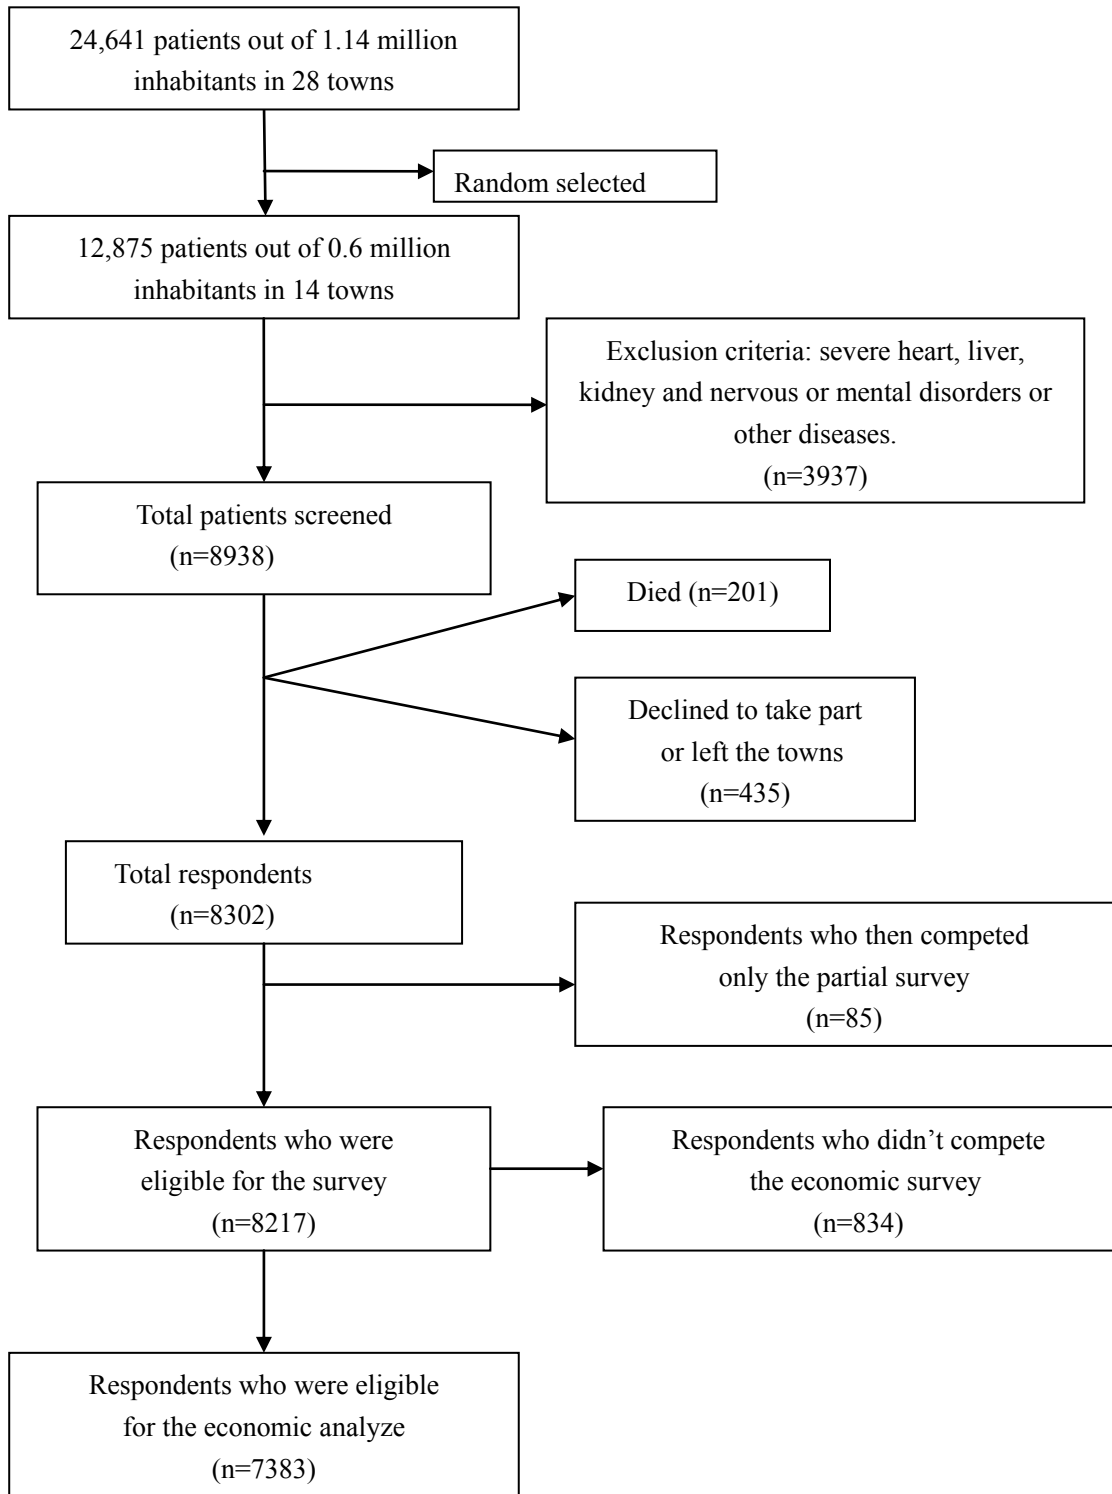

Supplement: MOESM1 [file 9491286]
